CORRECTION

# Correction: Deciphering the Genetic Programme Triggering Timely and Spatially-Regulated Chitin Deposition

The *PLOS Genetics* Staff

There are errors in the author affiliations. The affiliations should appear as shown here: Bernard Moussian<sup>1</sup><sup>✉a</sup>, Annalisa Letizia<sup>2</sup><sup>✉</sup>, Guillermo Martínez-Corrales<sup>2</sup><sup>✉</sup>, Bárbara Rotstein<sup>2</sup><sup>✉b</sup>, Andreu Casali<sup>3</sup> and Marta Llimargas<sup>2</sup><sup>\*</sup>

1. Animal Genetics, Interfaculty Institute for Cell Biology, University of Tuebingen, Tuebingen, Germany, 2. Institut de Biologia Molecular de Barcelona, CSIC. Barcelona, Spain, 3. Institute for Research in Biomedicine (IRB Barcelona), Barcelona, Spain

<sup>✉a</sup>. Present address: Institut de Biologie Valrose, UNS Université Nice Sophia Antipolis, Nice, France

<sup>✉b</sup>. Present address: Fachbereich Biologie/Chemie, University of Osnabrück, Osnabrück, Germany

 These authors contributed equally to this work.

\* [mlcbmc@ibmb.csic.es](mailto:mlcbmc@ibmb.csic.es)

The acknowledgments are incorrect. The acknowledgments should appear as shown here:

## Acknowledgments

We thank N. Luque, E. Fuentes, and Matthias Floetenmeyer (MPI Tuebingen) for technical assistance and T. Yates for corrections. We thank M. Norum for *UASkkyGFP*, A. Ozturk for the *kky* rescue experiment, and specially N. Martín for excellent technical help, Exp and Reb antibodies and fluorochrome-conjugated CBP production. We also acknowledge the Developmental Studies Hybridoma Bank, the Bloomington Stock Centre, and the fly community for fly lines and antibodies. Thanks also go to the members of the Llimargas lab for helpful discussions and J. Casanova, M. Furriols, and S. Araújo for critically reading the manuscript.

## Reference

1. Moussian B, Letizia A, Martínez-Corrales G, Rotstein B, Casali A, Llimargas M. Deciphering the Genetic Programme Triggering Timely and Spatially-Regulated Chitin Deposition. *PLoS Genet* 2015; 11(1): e1004939. doi:[10.1371/journal.pgen.1004939](https://doi.org/10.1371/journal.pgen.1004939) PMID: [25617778](https://pubmed.ncbi.nlm.nih.gov/25617778/)

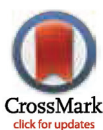

CrossMark  
click for updates

## OPEN ACCESS

**Citation:** The *PLOS Genetics* Staff (2015) Correction: Deciphering the Genetic Programme Triggering Timely and Spatially-Regulated Chitin Deposition. *PLoS Genet* 11(3): e1005054. doi:[10.1371/journal.pgen.1005054](https://doi.org/10.1371/journal.pgen.1005054)

**Published:** March 17, 2015

**Copyright:** © 2015 The PLOS Genetics Staff. This is an open access article distributed under the terms of the [Creative Commons Attribution License](https://creativecommons.org/licenses/by/4.0/), which permits unrestricted use, distribution, and reproduction in any medium, provided the original author and source are credited.
